# Supplementary material for: Operando electrochemical fluorination to achieve Mn4+/Mn2+ double redox in a Li2MnO3-like cathode
Source: Royal Society of Chemistry journal article supplement (doi:10.1039/d1cc06865b), 2022-01-01
Supplement: d1cc06865b1.pdf [file d1cc06865b1.pdf]

## Supporting Information

# *Operando* electrochemical fluorination to achieve Mn<sup>4+</sup>/ Mn<sup>2+</sup> double redox in Li<sub>2</sub>MnO<sub>3</sub>-like

Guang Liu<sup>‡1,2</sup>, Hui Xu<sup>‡3</sup>, Zhongheng Wang<sup>1,2</sup>, and Sa Li<sup>\*1,2</sup>

<sup>1</sup>School of Materials Science and Engineering, Tongji University, Shanghai 201804, China

<sup>2</sup>Institute of New Energy for Vehicles, Tongji University, Shanghai 201804, China

<sup>3</sup>School of Materials Science and Engineering, Shanghai Institute of Technology, Shanghai, 201418, China

<sup>‡</sup>These authors contributed equally to this work.

## Experimental

**Material synthesis.** The Li<sub>2</sub>MnO<sub>3</sub>-like cathode materials were synthesized by the solid-state reaction by using LiOH·H<sub>2</sub>O (Adamas, 99%) and MnCO<sub>3</sub> (Aladdin, 99.95%) as precursors, in which the molar ratio of LiOH·H<sub>2</sub>O: MnCO<sub>3</sub> was 2:1. The precursors were mixed in ethanol and mechanical ball milled for 12 hours. The drying mixture was calcined at 500°C for 12 hours to obtain the final materials.

**Material Characterization.** X-ray diffraction (XRD) patterns were collected on a powder diffractometer (Rigaku Ultima IV) equipped with Cu-K<sub>α</sub> radiation in the 2-theta range from 10° to 80°. The morphologies of materials were characterized by Quanta 200 field emission scanning electron microscope (FESEM). Transmission electron microscopy (TEM) spectra were acquired from a JEM-2100F microscope.

**Electrochemical tests.** The synthesized Li<sub>2</sub>MnO<sub>3</sub>-like material was mixed with carbon black and polyvinylidene fluoride (PVDF) in N-methylpyrrolidone (NMP) with a weight ratio of 8:1:1 to obtain a slurry. The slurry was then cast on an aluminum foil current collector, then it was dried under vacuum at 100°C overnight to obtain a cathode film. The loading of positive active material is 2.21~2.47 mg/cm<sup>2</sup>. To assemble a cell for electrochemical tests, Coin cells (CR2025) were assembled in an Ar atmosphere glove box using Li metal foil as the counter electrode. The electrolyte was 1 M LiPF<sub>6</sub> in ethylene carbonate and dimethyl carbonate (EC/DMC=1:1) solution. The tests were carried out on a battery test system (Neware, Shenzhen, China). Electrochemical impedance spectroscopy (EIS) data was performed on a CHI600A Electrochemical workstation (Chinster, Shanghai, China), with 5 mV ac excitation over a frequency range of 1 mHz to 100 kHz. Cyclic voltammogram (CV) test was performed at a scan rate of 0.1 mV/s among voltage range of 1.5 V to 4.8 V (vs. Li<sup>+</sup>/Li) by a CHI600A Electrochemical workstation (Chinster, Shanghai, China). DEMS analysis was used to detect and analyze the gas during cycling, and DEMS analyses in half cells were tested with a constant current density of 10 mA/g with the loading of 16 mg/cm<sup>2</sup> when charging to 4.8 V in the first cycle.

**Soft X-ray absorption spectroscopy (sXAS) measurements.** Soft X-ray absorption spectroscopy (sXAS) measurements of Mn edge and O K-edge in partial fluorescence yield (PFY) mode were carried out at the IOS (23-ID-2) beamline of National Synchrotron Light Source II at Brookhaven National Laboratory. We followed the same normalization methodology as in the literature.<sup>1, 2</sup> For each sample, the PFY-sXAS were collected from four local areas and the average intensity is firstly normalized by an individual photodiode scan. A linear sloping background is next removed by linear fitting of the flat low-temperature region from 520.0 to 523.0 eV before the absorption peaks. Lastly,

the spectrum is normalized by setting the low-energy region to zero intensity and the main peak to unity intensity. For Mn L<sub>3</sub> edge, the curves of TEY and FY models are normalized by setting the low-energy region at 638.0 eV to zero intensity and the main peak region at ~643.7 eV to unity intensity. For O K-edge, the curves of TEY and FY models are normalized by setting the low-energy region at 526.0 eV to zero intensity and the main peak region at ~529.5 eV to unity intensity.

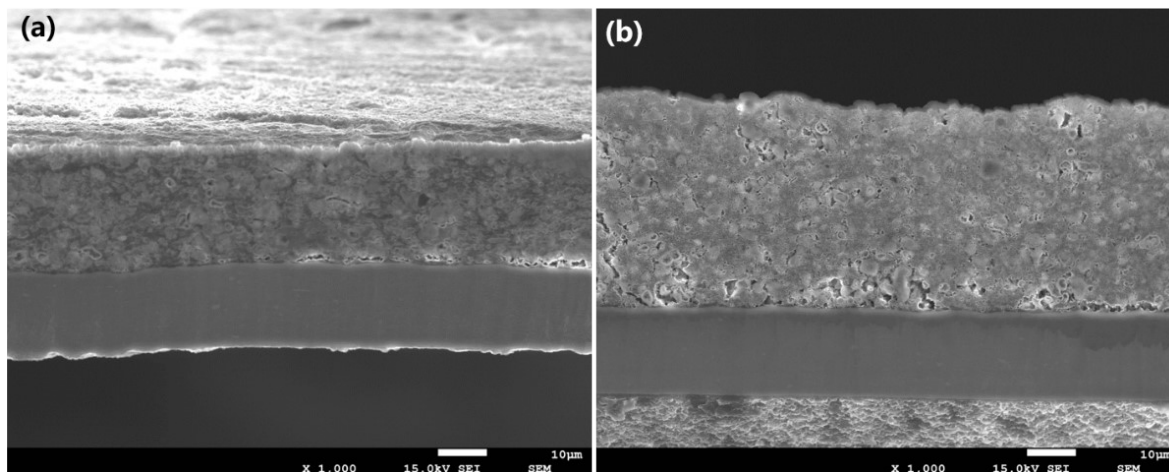

**Fig. S1** SEM of the positive plates prepared by the FIB lift-out technique: (a) the pristine state, (b) the initial discharged to 1.5V

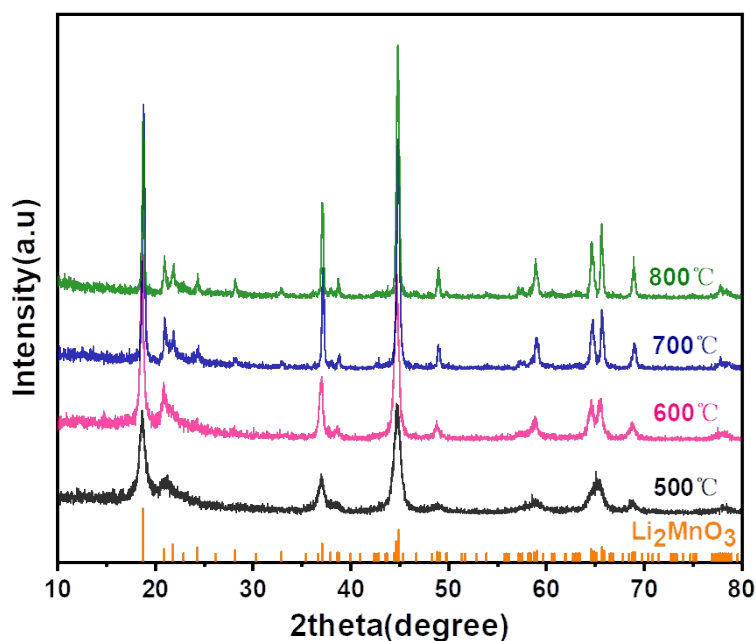

**Fig. S2** XRD patterns of the Li<sub>2</sub>MnO<sub>3</sub> powders calcinated at different temperatures.

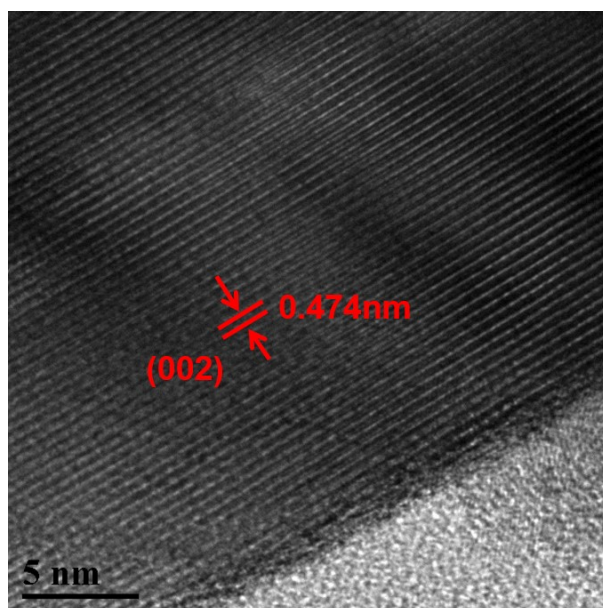

Fig. S3 The TEM image of  $\text{Li}_2\text{MnO}_3$  calcined at  $600^\circ\text{C}$ .

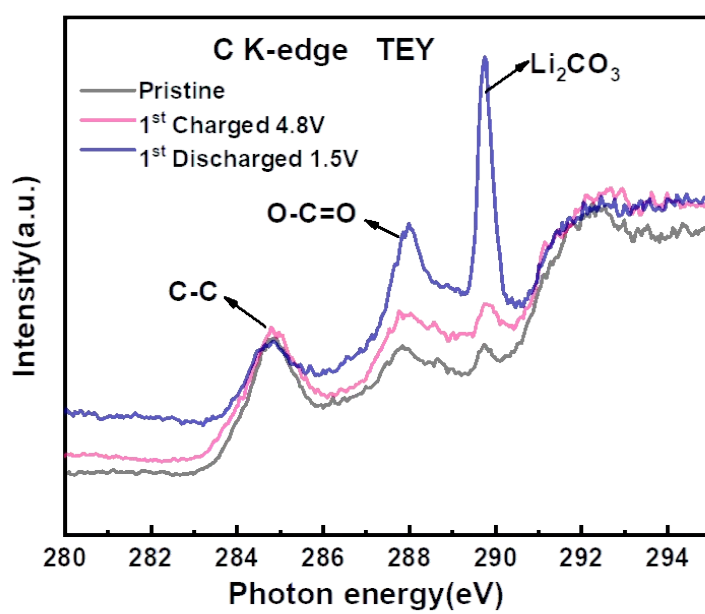

Fig. S4 Changes in C K-edge XAS spectra in different states.

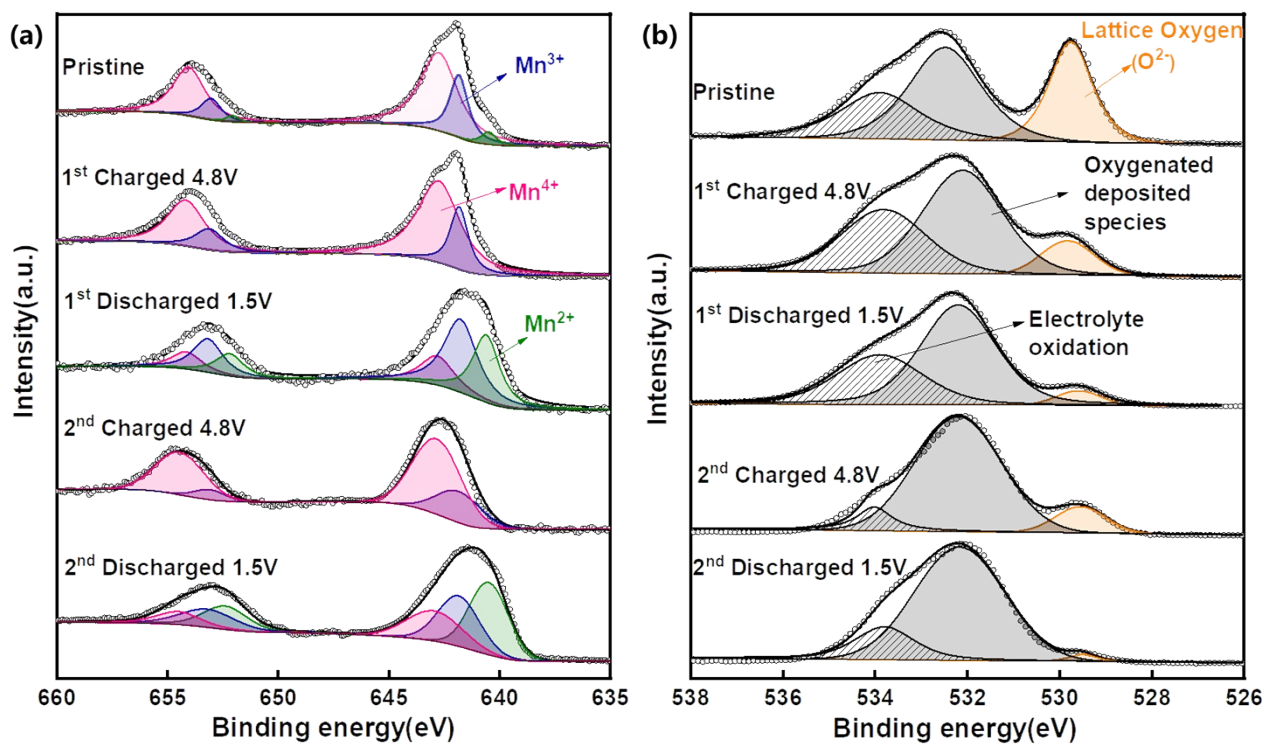

**Fig. S5** XPS on the surface of LMOF at various states of electrochemical cycling. (a) Mn 2p XPS spectra, (b) O 1s XPS spectra.

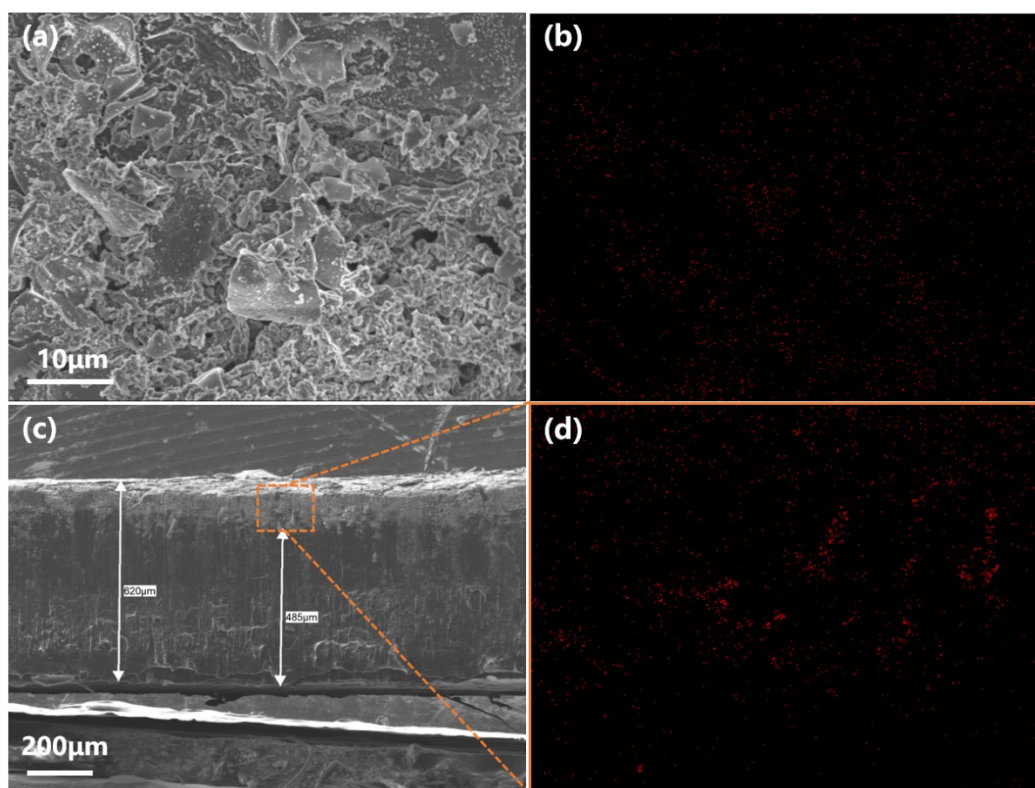

**Fig. S6** (a) SEM images of Li metal anode surface after the first charge/discharge activation. (b) EDS mapping of Mn in (a). (c) The cross-sectional SEM of Li metal anode. (d) EDS mapping of Mn in enclosed in a square in (c).

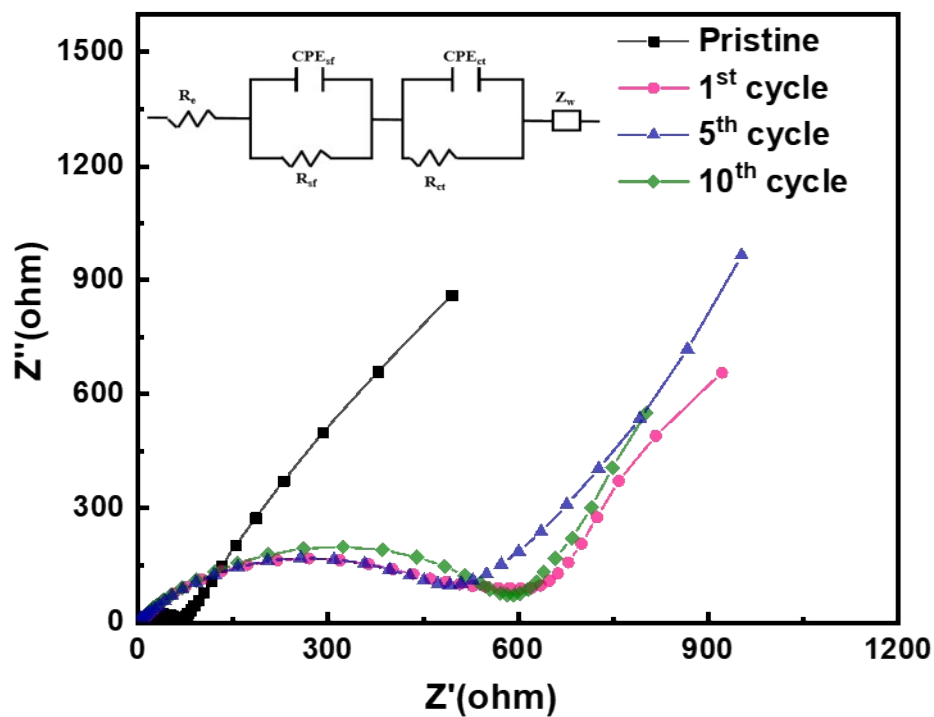

**Fig. S7** EIS before cycle and after 1<sup>st</sup>, 5<sup>th</sup>, 10<sup>th</sup> cycle at a discharged state of 1.5 V, the equivalent circuit model is shown in the inset.

## References

- 1 K. Luo, M. R. Roberts, R. Hao, N. Guerrini, D. M. Pickup, Y.-S. Liu, K. Edstrom, J. Guo, A. V. Chadwick, L. C. Duda and P. G. Bruce, *Nat. Chem.*, 2016, **8**, 684-691.
- 2 K. Luo, M. R. Roberts, N. Guerrini, N. Tapia-Ruiz, R. Hao, F. Massel, D. M. Pickup, S. Ramos, Y.-S. Liu, J. Guo, A. V. Chadwick, L. C. Duda and P. G. Bruce, *J. Am. Chem. Soc.*, 2016, **138**, 11211-11218.
